# Supplementary material
Source: publisher figshare collection journal article supplement (https://acs.figshare.com/ndownloader/files/4374589)
Supplement: Supplementary file 1 [file 4374589]

## Supporting Information

### **Siting and mobility of deuterium absorbed in co-sputtered Mg<sub>0.65</sub>Ti<sub>0.35</sub>. A MAS <sup>2</sup>H NMR study**

*S. Srinivasan,<sup>1</sup> P.C.M.M. Magusin,<sup>1\*</sup> R. A. van Santen,<sup>1</sup> P.H.L. Notten,<sup>1</sup>  
H. Schreuders,<sup>2</sup> B. Dam<sup>2</sup>*

#### Affiliations

<sup>1</sup>Eindhoven University of Technology, P. O. Box 513, 5600 MB Eindhoven, The Netherlands

<sup>2</sup> Delft University of Technology, The Netherlands.

\* corresponding author; email: p.c.m.m.magusin@tue.nl

Technische Universiteit Eindhoven, P. O. Box 513, Eindhoven, The Netherlands (phone:  
0031-402472435)

# Static and MAS $^2\text{H}$ NMR of $\text{MgD}_2$ and $\text{Mg}_{0.65}\text{Sc}_{0.35}\text{D}_{2.2}$ : experimental and simulated NMR spectra

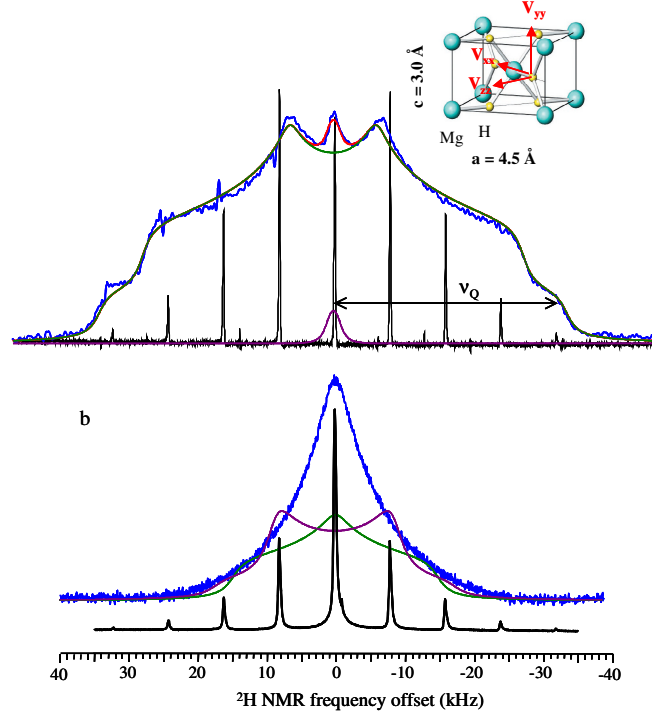

**Figure S1:** Static and 8-kHz MAS  $^2\text{H}$  NMR lineshapes of (a)  $\text{MgD}_2$  and (b)  $\text{Mg}_{0.65}\text{Sc}_{0.35}\text{D}_{2.2}$  compared to simulated quadrupolar lineshapes

$$\Delta \nu = \frac{\nu_Q}{2} \left[ 3 \cos^2 \theta - 1 + \eta \sin^2 \theta \cos 2\phi \right]$$

for selected values of the quadrupolar coupling constant  $\nu_Q$  = asymmetry parameter  $\eta$ . (a) Main component  $\nu_Q = 28$  kHz and  $\eta = 0.65$  combined with 1 % isotropic component due to unknown impurity. (b) lineshapes generated for (green)  $\nu_Q = 15$  kHz and  $\eta = 1$  and (purple)  $\nu_Q = 17$  kHz and  $\eta = 0$ . Both combinations ( $\nu_Q$ ,  $\eta$ ) describe the MAS sideband pattern of  $\text{Mg}_{0.65}\text{Sc}_{0.35}\text{D}_{2.2}$  equally well, but not the static  $^2\text{H}$  NMR lineshape of this ternary compound.

The inset above the  $\text{MgD}_2$  spectrum in Fig. S1a illustrates the rutile structure of  $\text{MgD}_2$ , in which each deuterium atom has a planar threefold Mg coordination ( $d_{\text{Mg-D}} = 1.95$  Å) with Mg at the corners of a triangle with one side of 3.01 Å and two sides of 3.52 Å. The inset also shows the principal axes system of the quadrupolar tensor  $\underline{V}$  associated with deuterium at  $(1-\xi, \xi, 1/2)$  with  $\xi = 0.303$ . The principal tensor values  $\{V_{11}, V_{22}, V_{33}\}$  are proportional to the 2<sup>nd</sup> order derivatives of the electric potential energy mainly caused by the closest three Mg atoms at  $(1,0,0)$ ,  $(1,0,1)$  and  $(1/2, 1/2, 1/2)$ . The asymmetry parameter  $\eta = |V_{11} - V_{22}| / V_{33}$  computed from the three 2<sup>nd</sup>-order derivatives equals 0.61.
